# Supplementary material
Source: ML conference proceedings conference paper supplement (https://openreview.net/forum?id=6NczjqEcO5)
Supplement: supplementary_material [file appendix.pdf › appendix.pdf]

## A Additional Experimental Results

Table 3: Experimental results (%) on **BTAD**. We compare the performance between SAC-BL algorithm and SAC-SBL based on the same trained SAC network.  $\uparrow$  indicates larger values are better and vice versa.

| Category | Method  | Image-level    |                  |                     | Pixel-level    |                  |                     |
|----------|---------|----------------|------------------|---------------------|----------------|------------------|---------------------|
|          |         | TPR $\uparrow$ | FPR $\downarrow$ | F1-score $\uparrow$ | TPR $\uparrow$ | FPR $\downarrow$ | F1-score $\uparrow$ |
| 01       | SAC-BL  | 100.0          | 18.37            | 81.35               | 93.41          | 42.90            | 92.17               |
|          | SAC-SBL | 100.0          | 15.33            | 84.00               | 93.13          | 38.87            | 95.76               |
| 02       | SAC-BL  | 100.0          | 68.50            | 30.46               | 99.80          | 91.73            | 91.86               |
|          | SAC-SBL | 100.0          | 62.00            | 37.25               | 99.78          | 85.40            | 97.32               |
| 03       | SAC-BL  | 99.00          | 14.63            | 98.75               | 99.70          | 78.95            | 96.68               |
|          | SAC-SBL | 99.00          | 14.63            | 98.75               | 99.70          | 76.68            | 99.77               |
| Average  | SAC-BL  | 99.67          | 33.83            | 70.19               | 97.63          | 71.19            | 93.57               |
|          | SAC-SBL | 99.67          | 30.65            | 73.33               | 97.54          | 66.98            | 97.61               |

## B Proofs

### B.1 Proof of Theorem 3.2

*Proof.* For the observations  $\tilde{T}_1, \tilde{T}_2, \dots, \tilde{T}_n$ , denote

$$\hat{\Psi}_0(t) = \frac{1}{n_0} \sum_{i \in \mathcal{H}_0} \mathbf{1}(\tilde{T}_i \geq t) \quad \hat{\Psi}_1(t) = \frac{1}{n_1} \sum_{i \in \mathcal{H}_1} \mathbf{1}(\tilde{T}_i \geq t),$$

where  $n_0 = |\mathcal{H}_0| = n - n^{1-\beta}$  and  $n_1 = |\mathcal{H}_1| = n^{1-\beta}$ . Then, the empirical survival function can be expressed as

$$\hat{\Psi}(t) = \frac{n_0}{n} \hat{\Psi}_0(t) + \frac{n_1}{n} \hat{\Psi}_1(t) = (1 - \eta) \hat{\Psi}_0(t) + \eta \hat{\Psi}_1(t), \quad (9)$$

where  $\eta = \frac{1}{n^\beta}$ .

Let  $\tilde{T}_{(i)}$  be the  $i$ -th order statistic of  $\tilde{T}_1, \tilde{T}_2, \dots, \tilde{T}_n$  from the largest to the smallest. Hence, we have  $\hat{\Psi}(\tilde{T}_{(i)}) = \frac{i}{n}$ . It follows that

$$\begin{aligned} \left\{ p_{(i)}^\gamma \leq \frac{\delta i}{n} \alpha \right\} &= \left\{ \Psi^\gamma(\tilde{T}_{(i)}) \leq \delta \alpha \hat{\Psi}(\tilde{T}_{(i)}) \right\} \\ &= \left\{ \tilde{T}_{(i)} \geq \Psi^{-1} \left( (\delta \alpha \hat{\Psi}(\tilde{T}_{(i)}))^{\gamma^{-1}} \right) \right\}, \end{aligned}$$

where  $\Psi^{-1}(\cdot)$  is the inverse function of  $\Psi(\cdot)$ . According to the definition of  $k_{BL}$ , we have  $\tilde{T}_{(i)} \geq \Psi^{-1} \left( (\delta \alpha \hat{\Psi}(\tilde{T}_{(i)}))^{\gamma^{-1}} \right)$  if  $i \leq k_{BL}$ , and  $\tilde{T}_{(i)} < \Psi^{-1} \left( (\delta \alpha \hat{\Psi}(\tilde{T}_{(i)}))^{\gamma^{-1}} \right)$  if  $i > k_{BL}$ .

Note that  $\hat{\Psi}(\cdot)$  is constant between two observations. Hence, there exists  $\zeta_n^1 \in (\tilde{T}_{k_{BS}+1}, \tilde{T}_{k_{BS}})$  such that

$$\zeta_n = \min \left\{ t : t \geq \Psi^{-1} \left( (\delta \alpha \hat{\Psi}(t))^{\gamma^{-1}} \right) \right\} = \min \left\{ t : t = \Psi^{-1} \left( (\delta \alpha \hat{\Psi}(t))^{\gamma^{-1}} \right) \right\} \quad (10)$$

In terms of notation  $\zeta_n$ , the FPR of SAC-BL algorithm can be represented as

$$\begin{aligned} \frac{|\mathcal{R}^c \cap \mathcal{H}_1|}{|\mathcal{H}_1|} &= \frac{1}{n_1} \sum_{i \in \mathcal{H}_1} \mathbf{1} \left( p_{(i)}^\gamma > \frac{\delta k_{BL}}{n} \alpha \right) \\ &= \frac{1}{n_1} \sum_{i \in \mathcal{H}_1} \mathbf{1} \left( \tilde{T}_i < \zeta_n \right) = 1 - \frac{1}{n_1} \sum_{i \in \mathcal{H}_1} \mathbf{1} \left( \tilde{T}_i \geq \zeta_n \right) = 1 - \hat{\Psi}_1(\zeta_n). \end{aligned}$$

The above analysis shows that we just need to prove that  $\hat{\Psi}_1(\zeta_n)$  converges to 1 in probability. For this purpose, the following theorem is required.

<sup>1</sup> $\zeta_n$  depends on the observations  $\tilde{T}_1, \tilde{T}_2, \dots, \tilde{T}_n$ .

**Theorem B.1** (Eicker (1979)). *Let  $X_1, X_2, \dots, X_n$  be independent and identically distributed random variables with the continuous survival function  $\Psi(\cdot)$ . Denote by  $\hat{\Psi}(\cdot)$  the empirical survival function. Then, as  $n \rightarrow \infty$ , we have*

$$\frac{1}{v_n} \sup_t \frac{\hat{\Psi}(t) - \Psi(t)}{\sqrt{\Psi(t)(1 - \Psi(t))}} \rightarrow 1$$

where  $v_n = \sqrt{\frac{2 \log \log n}{n}}$ .

By Theorem B.1, we obtain

$$\begin{aligned}\hat{\Psi}_1(t) &= \Psi(t) + O_p(v_{n_0} \sqrt{\Psi(t)(1 - \Psi(t))}) \\ \hat{\Psi}_1(t) &= \Psi(t - \mu) + O_p(v_{n_1} \sqrt{\Psi(t - \mu)(1 - \Psi(t - \mu))})\end{aligned}$$

Then, the empirical function  $\hat{\Psi}(t)$  in Eq. (9) can be represented as

$$\hat{\Psi}(t) = (1 - \eta)\Psi(t) + \eta\Psi(t - \mu) + Q_n(t),$$

where

$$Q_n(t) = O_p\left((1 - \eta)v_{n_0} \sqrt{\Psi(t)(1 - \Psi(t))}\right) + O_p\left(\eta v_{n_1} \sqrt{\Psi(t - \mu)(1 - \Psi(t - \mu))}\right).$$

Particularly, we conclude

$$\hat{\Psi}_1(\zeta_n) = \Psi(\zeta_n - \mu) + o_p(1),$$

since  $v_{n_1}$  converges to 0 and  $\sqrt{\Psi(\zeta_n - \mu)(1 - \Psi(\zeta_n - \mu))}$  is bounded. Therefore, the rest is to show  $\Psi(\zeta_n - \mu)$  converges to 1 in probability, equivalently,  $\zeta_n - \mu \rightarrow -\infty$  in probability. Next, we focus on proving that for  $\varepsilon > 0$ ,

$$\mathbb{P}(\zeta_n - \mu < -\varepsilon) \rightarrow 1$$

as  $n \rightarrow \infty$ .

Recall that  $r > \beta$ , take a number  $\nu \in (\beta, r)$  such that  $\gamma\nu > \beta$ , and define  $\rho_n = (\tau\nu \log n)^{1/\tau}$ , then  $\rho_n - \mu \rightarrow \infty$ . Denote two events:

$$A = \{\rho_n - \mu < -\varepsilon\}, \quad B = \{\zeta_n \leq \rho_n\}.$$

Obviously, we have  $\mathbb{P}(A) = 1$  and  $A \cap B \subset \{\zeta_n - \mu < -\varepsilon\}$ . The above arguments indicate  $\mathbb{P}(B) \leq \mathbb{P}(\zeta_n - \mu < -\varepsilon)$ , thus, it suffices to prove that  $\mathbb{P}(\zeta_n \leq \rho_n)$  converges to 1. Since  $\Psi(\cdot) \in \mathcal{F}$ , we have

$$\Psi(\rho_n) = \frac{1}{n^{\nu+o(1)}}.$$

Note that  $\rho_n - \mu \rightarrow -\infty$ , so  $\Psi(\rho_n - \mu) \rightarrow 1$ . It follows that

$$(1 - \eta)\Psi(\rho_n) + \eta\Psi(\rho_n - \mu) \sim \frac{1}{n^\beta}$$

where  $\eta = \frac{1}{n^\beta}$ . Similarly, the simple analysis can derive that

$$\begin{aligned}O_p\left(\eta v_{n_1} \sqrt{\Psi(\rho_n - \mu)(1 - \Psi(\rho_n - \mu))}\right) &= o_p\left(\frac{1}{n^\beta}\right) \\ O_p\left((1 - \eta)v_{n_0} \sqrt{\Psi(\rho_n)(1 - \Psi(\rho_n))}\right) &= o_p\left(\frac{1}{n^\beta}\right)\end{aligned}$$

since  $\kappa_{n_0} = o(\frac{1}{n^{\beta/2}})$ . The above arguments indicate that  $\hat{\Psi}(\rho_n) = \frac{1}{n^\beta} + o_p(\frac{1}{n^\beta})$ . Note that  $(\gamma)\nu - \beta > 0$  and

$$\frac{\frac{1}{n^\beta} + o_p(\frac{1}{n^\beta})}{\frac{1}{n^{\beta+o_p(\frac{1}{n^\beta})}}} = \frac{\frac{1}{n^\beta} + o_p(\frac{1}{n^\beta})}{\frac{1}{n^\beta}} \cdot \frac{\frac{1}{n^\beta}}{\frac{1}{n^{\beta+o_p(\frac{1}{n^\beta})}}} \xrightarrow{P} 1,$$

we conclude that

$$\begin{aligned}\frac{\Psi^\gamma(\rho_n)}{\hat{\Psi}(\rho_n)} &= \frac{\frac{1}{n^{\gamma\nu+o_p(1)}}}{\frac{1}{n^{\beta+o_p(\frac{1}{n^\beta})}}} \cdot \frac{\frac{1}{n^{\beta+o_p(\frac{1}{n^\beta})}}}{\frac{1}{n^\beta} + o_p(\frac{1}{n^\beta})} \\ &= \frac{1}{n^{\gamma\nu-\beta+o_p(1)+o_p(\frac{1}{n^\beta})}} \cdot \frac{\frac{1}{n^{\beta+o_p(\frac{1}{n^\beta})}}}{\frac{1}{n^\beta} + o_p(\frac{1}{n^\beta})} \xrightarrow{P} 0,\end{aligned}$$

namely, for any  $\varepsilon > 0$ , we have

$$\mathbb{P}\left(\frac{\Psi^\gamma(\rho_n)}{\hat{\Psi}(\rho_n)} \leq \varepsilon\right) \rightarrow 1. \quad (11)$$

Denote

$$\mathcal{S} := \left\{t : t \geq \Psi^{-1}\left((\delta\alpha\hat{\Psi}(t))^{\gamma^{-1}}\right)\right\} = \left\{t : \Psi^\gamma(t) \leq \delta\alpha\hat{\Psi}(t)\right\}$$

By (11),

$$\mathbb{P}\left(\frac{\Psi^\gamma(\rho_n)}{\hat{\Psi}(\rho_n)} \leq \delta\alpha\right) \rightarrow 1,$$

and  $\mathbb{P}(\rho_n \in \mathcal{S}) = \mathbb{P}\left(\Psi^\gamma(\rho_n)\hat{\Psi}(\rho_n) \leq \delta\alpha\hat{\Psi}(\rho_n)\right) \rightarrow 1$ . According to the definition of  $\zeta_n$  in (10), if  $\rho_n \in \mathcal{S}$ , we have  $\zeta_n \leq \rho_n$ . It follows that

$$1 \geq \mathbb{P}(\zeta_n \leq \rho_n) \geq \mathbb{P}(\rho_n \in \mathcal{S}) \rightarrow 1,$$

Therefore, we have

$$\mathbb{P}(\zeta_n \leq \rho_n) \rightarrow 1,$$

which completes the proof of Theorem 3.2.  $\square$

### B.2 Proof of Theorem 3.3

*Proof.* According to Theorem 3.2, we know

$$\frac{|\mathcal{R}^c \cap \mathcal{H}_1|}{|\mathcal{H}_1|} \rightarrow 0 \quad \text{in probability}$$

as  $n \rightarrow \infty$ . Note that  $\frac{|\mathcal{R}^c \cap \mathcal{H}_1|}{|\mathcal{H}_1|} \leq 1$  almost surely, Then, by bounded convergence theorem, we have

$$\lim_{n \rightarrow \infty} \mathbb{E}\left(\frac{|\mathcal{R}^c \cap \mathcal{H}_1|}{|\mathcal{H}_1|}\right) = 0.$$

If  $\lim_{n \rightarrow \infty} \mathbb{E}\left(\frac{|\mathcal{R}^c \cap \mathcal{H}_1|}{|\mathcal{H}_1|}\right) = 0$ , by Markov's inequality, for any  $\varepsilon > 0$ ,

$$\mathbb{P}\left(\frac{|\mathcal{R}^c \cap \mathcal{H}_1|}{|\mathcal{H}_1|} > \varepsilon\right) \leq \frac{\mathbb{E}\left(\frac{|\mathcal{R}^c \cap \mathcal{H}_1|}{|\mathcal{H}_1|}\right)}{\varepsilon} \rightarrow 0.$$

Hence,  $\frac{|\mathcal{R}^c \cap \mathcal{H}_1|}{|\mathcal{H}_1|}$  converges 0 in probability. The above arguments demonstrate that

$$\frac{|\mathcal{R}^c \cap \mathcal{H}_1|}{|\mathcal{H}_1|} \xrightarrow{P} 0$$

if and only if

$$\lim_{n \rightarrow \infty} \mathbb{E}\left(\frac{|\mathcal{R}^c \cap \mathcal{H}_1|}{|\mathcal{H}_1|}\right) = 0.$$

$\square$

### B.3 Prrof of Theorem 4.3

*Proof.* According to the Definition 4.1, for any  $p_i$ , we have

$$\{\Upsilon_{\kappa(i)}(p_i) \leq \xi_{\kappa(i)}\} \Leftrightarrow \left\{\Lambda \leq \frac{\xi_{\kappa(i)}}{p_i^\gamma}\right\}.$$

It is easy to verify that

$$\{\xi_{\kappa(j)} \leq \xi_i\} \Leftrightarrow \{\epsilon_j \leq i\},$$

where  $j \in [n]$  and  $i \in \mathcal{B} := \{\kappa(1), \kappa(2), \dots, \kappa(n)\}$ . Define  $\mathcal{G}_i := \{j \in [n] : \kappa(j) \leq i\}$  where  $i \in \mathcal{B}$ . According to the definition of  $\kappa(i)$ , we have  $|\mathcal{G}_i| = i$  where  $i \in \mathcal{B}$  and  $\mathcal{G}_i \subset \mathcal{G}_j$  for  $i < j$

where  $i, j \in \mathcal{B}$ . For any  $j \in [n]$  satisfying  $p_j \leq p_{(i)}$ , we have that  $\kappa(j) < i$ . Then, for any  $i \notin \mathcal{B}$ , we have that

$$|\{j \in [n] : \Upsilon_{\kappa(j)}(p_j) \geq \xi_i\}| < i$$

It follows that the number of hypotheses rejected by the SAC-BL algorithm in Definition 4.1 belongs to  $\mathcal{B}$ , i.e.,  $i_{SBL}^* \in \mathcal{B}$ . Define

$$\mathcal{B}_i = \min \{j \in \mathcal{B} : j \geq i\}.$$

It follows that

$$\{i_{SBL}^* \geq i\} \Leftrightarrow \{i_{SBL}^* \geq \mathcal{B}_i\}.$$

Based on the above analysis, we have the following relationship:

$$\begin{aligned} \{i \leq i_{SBL}^*\} &\Leftrightarrow \{\Upsilon_{\kappa(j)}(p_j) \leq \xi_{\kappa(j)} \text{ for } j \in \mathcal{G}_i\} \\ &\Leftrightarrow \left\{ \Lambda \leq \frac{\xi_{\kappa(j)}}{p_j^\gamma} \text{ for } j \in \mathcal{G}_i \right\} \\ &\Leftrightarrow \left\{ \Lambda \leq \frac{\xi_i}{p_{(i)}^\gamma} \right\}. \end{aligned} \quad (12)$$

According to the Definition 4.2, we have

$$\left\{ \frac{1}{p_{(i)}^\gamma} \geq \frac{n\Lambda}{\delta\alpha i} \right\} \Leftrightarrow \left\{ \Lambda \leq \frac{\xi_i}{p_{(i)}^\gamma} \right\}. \quad (13)$$

Combining Eq. (12) and Eq. (13), we conclude that the SBL algorithm in Definition 4.1 is equivalent to the one in Definition 4.2.  $\square$

#### B.4 Proof of Theorem 4.4

*Proof.* Note that

$$\left\{ p_i^\gamma \cdot \mathbf{1}(p_i^\gamma \leq \xi_i) \leq \frac{\delta\alpha i}{n} \right\} \Leftrightarrow \left\{ \frac{\delta}{p_i^\gamma} \cdot \mathbf{1}\left(\frac{\delta}{p_i^\gamma} \geq \frac{n}{\alpha i}\right) \geq \frac{n}{\alpha i} \right\}$$

and

$$\left\{ \xi_i \cdot \mathbf{1}(\Lambda \xi_i < \Lambda p_i^\gamma \leq \xi_i) \leq \frac{\delta\alpha i}{n} \right\} \Leftrightarrow \left\{ \frac{n}{\alpha i} \cdot \mathbf{1}\left(\frac{n}{\alpha i} > \frac{\delta}{p_i^\gamma} \geq \frac{n}{\alpha i} \Lambda\right) \geq \frac{n}{\alpha i} \right\}.$$

For simplicity, define  $\tilde{\xi}_i = \frac{n}{\alpha i}$  and

$$\tilde{\Upsilon}_i(x) = \frac{\delta}{x^\gamma} \cdot \mathbf{1}\left(\frac{\delta}{x^\gamma} \geq \tilde{\xi}_i\right) + \tilde{\xi}_i \cdot \mathbf{1}\left(\tilde{\xi}_i > \frac{\delta}{x^\gamma} \geq \tilde{\xi}_i \Lambda\right).$$

Then we conclude that

$$\left\{ \Upsilon_{\kappa(i)}(p_i) \leq \frac{\delta\alpha}{n} i_{SBL}^* \right\} \Leftrightarrow \left\{ \tilde{\Upsilon}_{\kappa(i)}(p_i) \geq \frac{n}{\alpha i_{SBL}^*} \right\}.$$

In other words, the null Hypothesis  $H_{i;0}$  is rejected by the SBL algorithm if and only if  $\tilde{\Upsilon}_{\kappa(i)}(p_i) \geq \frac{n}{\alpha i_{SBL}^*}$ .

According to the double expectation theorem, we have

$$\begin{aligned} \mathbb{E} \left( \tilde{\xi}_{\kappa(i)} \cdot \mathbf{1} \left( \tilde{\xi}_{\kappa(i)} > \frac{\delta}{p_i^\gamma} \geq \tilde{\xi}_{\kappa(i)} \Lambda \right) \right) &= \mathbb{E} \left( \mathbb{E} \left( \tilde{\xi}_{\kappa(i)} \cdot \mathbf{1} \left( \tilde{\xi}_{\kappa(i)} > \frac{\delta}{p_i^\gamma} \geq \tilde{\xi}_{\kappa(i)} \Lambda \right) \middle| p_1, \dots, p_n \right) \right) \\ &= \mathbb{E} \left( \tilde{\xi}_{\kappa(i)} \cdot \mathbf{1} \left( \frac{\delta}{p_i^\gamma} < \tilde{\xi}_{\kappa(i)} \right) \cdot \mathbb{P} \left( \frac{\delta}{p_i^\gamma} \geq \Lambda \tilde{\xi}_{\kappa(i)} \middle| p_1, \dots, p_n \right) \right) \\ &= \mathbb{E} \left( \tilde{\xi}_{\kappa(i)} \cdot \mathbf{1} \left( \frac{\delta}{p_i^\gamma} < \tilde{\xi}_{\kappa(i)} \right) \cdot \mathbb{P} \left( \frac{1}{\tilde{\xi}_{\kappa(i)}} \cdot \frac{\delta}{p_i^\gamma} \geq \Lambda \middle| p_1, \dots, p_n \right) \right) \\ &= \mathbb{E} \left( \tilde{\xi}_{\kappa(i)} \cdot \mathbf{1} \left( \frac{\delta}{p_i^\gamma} < \tilde{\xi}_{\kappa(i)} \right) \cdot \min \left\{ \frac{1}{\tilde{\xi}_{\kappa(i)}} \cdot \frac{\delta}{p_i^\gamma}, 1 \right\} \right) \\ &= \mathbb{E} \left( \frac{\delta}{p_i^\gamma} \cdot \mathbf{1} \left( \frac{\delta}{p_i^\gamma} < \tilde{\xi}_{\kappa(i)} \right) \right). \end{aligned}$$

It follows that

$$\begin{aligned}\mathbb{E}\left(\tilde{\Upsilon}_{\kappa(i)}(p_i)\right) &= \mathbb{E}\left(\frac{\delta}{p_i^\gamma} \cdot \mathbf{1}\left(\frac{\delta}{p_i^\gamma} \geq \tilde{\xi}_{\kappa(i)}\right)\right) + \mathbb{E}\left(\frac{\delta}{p_i^\gamma} \cdot \mathbf{1}\left(\frac{\delta}{p_i^\gamma} < \tilde{\xi}_{\kappa(i)}\right)\right) \\ &= \mathbb{E}\left(\frac{\delta}{p_i^\gamma}\right).\end{aligned}$$

Recall that the definition of p-value in 2.1, for any  $c \in (0, 1)$ , we have  $\mathbb{P}(p_i \leq c) \leq c$ . Denote by  $\Lambda$  the random variable uniformly distributed on  $(0, 1)$ . If  $c \geq 1$ , then  $\mathbb{P}(p_i \leq c) = \mathbb{P}(\Lambda \leq c) = 1$ . Otherwise, if  $0 < c < 1$ , we get  $\mathbb{P}(p_i \leq c) \leq c = \mathbb{P}(\Lambda \leq c)$ . Therefore, we conclude that

$$\mathbb{P}(p_i \leq c) \leq \mathbb{P}(\Lambda \leq c). \quad (14)$$

Then, it follows that

$$\begin{aligned}\mathbb{P}\left(\frac{\delta}{p_i^\gamma} > c\right) &\leq \mathbb{P}\left(p_i \leq \left(\frac{\delta}{c}\right)^{1/\gamma}\right) \\ &\leq \mathbb{P}\left(\Lambda \leq \left(\frac{\delta}{c}\right)^{1/\gamma}\right) = \mathbb{P}\left(\frac{\delta}{\Lambda^\gamma} > c\right).\end{aligned} \quad (15)$$

Note that for any non-negative random variable  $Y$ , its expectation satisfies

$$\mathbb{E}(Y) = \int_0^\infty y f(y) dy = \int_0^\infty \mathbb{P}(Y > y) dy.$$

Then we obtain

$$\begin{aligned}\mathbb{E}\left[\frac{\delta}{p_i^\gamma}\right] &= \int_0^\infty \mathbb{P}\left(\frac{\delta}{p_i^\gamma} \geq x\right) dx \leq \int_0^\infty \mathbb{P}\left(\frac{\delta}{X^\gamma} \geq x\right) dx \\ &= \mathbb{E}\left[\frac{\delta}{\Lambda^\gamma}\right] = \int_0^1 \frac{\delta}{x^\gamma} \cdot 1 dx \leq \int_0^1 \frac{1-\gamma}{x^\gamma} dx = 1.\end{aligned}$$

The above analysis indicates that

$$\mathbb{E}\left(\tilde{\Upsilon}_{\kappa(i)}(p_i)\right) \leq 1.$$

According to the SAC-BL algorithm, a null hypothesis  $H_i$  is rejected by the SAC-BL algorithm if the corresponding p-value  $p_i$  satisfies

$$\tilde{\Upsilon}_{\kappa(i)}(p_i) \geq \frac{n}{i_{SBL}^* \cdot \alpha}.$$

Note that

$$\mathbf{1}\left(\tilde{\Upsilon}_{\kappa(i)}(p_i) \geq \frac{n}{i_{SBL}^* \cdot \alpha}\right) = \mathbf{1}\left(\tilde{\Upsilon}_{\kappa(i)}(p_i) \cdot \frac{i_{SBL}^* \alpha}{n} \geq 1\right) \leq \tilde{\Upsilon}_{\kappa(i)}(p_i) \cdot \frac{i_{SBL}^* \alpha}{n}.$$

Then, the FDR of SAC-SBL algorithm satisfies

$$\begin{aligned}FDR_{SAC-SBL} &= \sum_{i=1}^n \mathbb{E}\left(\frac{\mathbf{1}\left(\tilde{\Upsilon}_{\kappa(i)}(p_i) \geq \frac{n}{i_{SBL}^* \cdot \alpha}\right)}{i_{SBL}^*}\right) \\ &\leq \sum_{i=1}^n \mathbb{E}\left(\frac{\tilde{\Upsilon}_{\kappa(i)}(p_i) i_{SBL}^* \alpha}{n \cdot i_{SBL}^*}\right) \\ &= \frac{\alpha}{n} \sum_{i=1}^n \mathbb{E}\left(\tilde{\Upsilon}_{\kappa(i)}(p_i)\right) \\ &\leq \frac{\alpha}{n} \cdot n = \alpha.\end{aligned}$$

Now, we aim to demonstrate that if a null hypothesis  $H_i$  is rejected by the SAC-BL algorithm, then  $H_i$  must be rejected by the SAC-SBL algorithm. Suppose  $H_i$  is rejected by the SAC-BL algorithm, then, we have

$$\frac{\delta}{p_i^\gamma} \geq \frac{n}{\alpha \cdot i_{BL}^*}$$

and  $\epsilon_i \leq i_{BL}^*$ . By the definition of  $\epsilon_i$  and  $\kappa(i)$ , we have

$$\frac{\delta \alpha i_{BL}^*}{np_{(i_{BL}^*)}^\gamma} \leq \frac{\delta \alpha \kappa(i)}{np_{(\kappa(i))}^\gamma} \leq \frac{\delta \alpha \kappa(i)}{np_i^\gamma}$$

Recall the definition of  $i_{BL}^*$ , we have

$$\frac{\delta}{p_{(i_{BL}^*)}^\gamma} \geq \frac{n}{\alpha \cdot i_{BL}^*}$$

Therefore, we conclude

$$\frac{\delta \alpha \kappa(i)}{np_i^\gamma} \geq \frac{\delta \alpha i_{BL}^*}{np_{(i_{BL}^*)}^\gamma} \geq 1.$$

If  $j > i_{BL}^*$ , then

$$\frac{j\delta}{p_{(j)}^\gamma} < \frac{n}{\alpha} \leq \frac{i_{BL}^*\delta}{p_{(i_{BL}^*)}^\gamma}$$

So, we have  $\kappa(i) \leq i_{BL}^*$ . It follows that

$$\frac{\delta}{p_i^\gamma} \geq \frac{n}{\alpha \kappa(i)} \geq \frac{n}{\alpha i_{BL}^*}.$$

Further, we have

$$\tilde{\Upsilon}_{\kappa(i)}(p_i) \geq \frac{n}{\alpha i_{BL}^*}.$$

In other words,  $H_i$  is rejected by the SAC-SBL algorithm. The above analysis show that  $\mathcal{R}_{SAC-BL} \subset \mathcal{R}_{SAC-SBL}$  almost surely, i.e.,

$$\mathbb{P}(\mathcal{R}_{SAC-BL} \subset \mathcal{R}_{SAC-SBL}) = 1.$$

If there exists a p-value  $p_i$  which satisfies  $\mathcal{P}\left(p_i^\gamma < \frac{\delta \alpha i_{BL}^*}{n}\right) > 0$ , then

$$\mathbb{P}\left(\tilde{\Upsilon}_{\kappa(i)}(p_i) \geq \frac{n}{\alpha i_{BL}^*}\right) > 0.$$

It follows that

$$\mathbb{P}(|\mathcal{R}_{SAC-BL}| < |\mathcal{R}_{SAC-SBL}|) > 0.$$

□

## B.5 Proof of Theorem 4.5

*Proof.* According to the definition of FPR, we have

$$FPR = \frac{FP}{FP + TN} = \frac{|\mathcal{R}^c \cup \mathcal{H}_1|}{|\mathcal{H}_1|}.$$

Therefore, larger  $\mathcal{R}$  means smaller FPR. Based on the conclusions in Theorem 4.4, the results in Theorem 4.5 are obvious. □

## C Limitation

**Limitation.** Our results in Theorems 3.2 and 3.3 are based on the generalized Gaussian-like distribution family. In the future work, we will discuss the potential extensions of our finding in Theorems 3.2 and 3.3 to more general distribution.
